# Supplementary material
Source: PubMed Central journal article supplement (PMC3732944)
Supplement: 1311405110_pnas.201311405SI.pdf [file 1311405110_pnas.201311405SI.pdf]

# Supporting Information

Suzuki et al. 10.1073/pnas.1311405110

**Table S1. Composition of standard diet for *Manduca sexta* based on ref. 1 and of the various diets used in this paper**

| Ingredient      | Standard diet* | Base diet* | Sucrose diet* | Casein diet* | Lipid diet* |
|-----------------|----------------|------------|---------------|--------------|-------------|
| Wheat germ      | 104.35         | —          | —             | —            | —           |
| Casein          | 46.96          | —          | —             | 58           | —           |
| Sucrose         | 41.74          | —          | 70            | —            | —           |
| Wesson's salt   | 15.65          | 15.65      | 15.65         | 15.65        | 15.65       |
| Torula yeast    | 20.87          | —          | —             | —            | —           |
| Cholesterol     | 4.54           | —          | —             | —            | 4.54        |
| Sorbic acid     | 2.61           | 2.61       | 2.61          | 2.61         | 2.61        |
| Methyl paraben  | 1.3            | 1.3        | 1.3           | 1.3          | 1.3         |
| Ascorbic acid   | 6.52           | 6.52       | 6.52          | 6.52         | 6.52        |
| Streptomycin    | 0.26           | 0.26       | 0.26          | 0.26         | 0.26        |
| Kanamycin       | 0.07           | 0.07       | 0.07          | 0.07         | 0.07        |
| Formaldehyde    | 0.11%          | 0.11%      | 0.11%         | 0.11%        | 0.11%       |
| Vitamin mixture | 1.30%          | 1.30%      | 1.30%         | 1.30%        | 1.30%       |
| Raw linseed oil | 0.54%          | —          | —             | —            | 0.54%       |
| Gelcarin        | 15.9           | 15.9       | 15.9          | 15.9         | 15.9        |

\*Numbers indicate gm/L diet except for the liquids, which are given as % (vol/vol) of the final diet. —, none present.

1. Bell RA, Joachim FG (1976) Techniques for rearing laboratory colonies of tobacco hornworms and pink bollworms. *Ann Entomol Soc Am* 69:365–373.
